# Supplementary material
Source: Elsevier journal article supplement (https://rcastoragev2.blob.core.windows.net/24baf434b0ca3bad941f3776815aaed2/mmc1.pdf)
Supplement: mmc1 [file mmc1.pdf]

**Cell, Volume 183**

## **Supplemental Information**

### **Neuronal Computation Underlying**

### **Inferential Reasoning in Humans and Mice**

**Helen C. Barron, Hayley M. Reeve, Renée S. Koolschijn, Pavel V. Perestenko, Anna Shpektor, Hamed Nili, Roman Rothaermel, Natalia Campo-Urriza, Jill X. O'Reilly, David M. Bannerman, Timothy E.J. Behrens, and David Dupret**

**Table S1 | Neural correlates of inference; related to Figure 2.**

Brain regions showing significant increase in BOLD signal for correct versus incorrect trials in the inference test (Figure 2B). Statistics reported in the association cortex are FWE whole-brain corrected at the cluster-level. Statistics reported in the hippocampus are peak-level FWE corrected using a small-volume correction method.

| Brain region             | P <sub>FWE-corr</sub> | T <sub>peak level</sub> | Coordinate |     |    |
|--------------------------|-----------------------|-------------------------|------------|-----|----|
|                          |                       |                         | x          | y   | z  |
| Right Association Cortex | P<0.001               | 5.79                    | 66         | -42 | 30 |
| Left Association Cortex  | P=0.001               | 5.45                    | -62        | -58 | 26 |
| Right Hippocampus        | P=0.022               | 4.15                    | 32         | -26 | -4 |

**Table S2 | Functional connectivity during inference; related to Figure 2.**

Brain regions showing significant psychophysiological interaction with activity in auditory cortex (seed region) during correct versus incorrect inference (Figure 2D). In all regions, statistics are FWE whole-brain corrected at the cluster-level.

| Brain region         | P <sub>FWE-corr</sub> | T <sub>peak level</sub> | Coordinate |     |     |
|----------------------|-----------------------|-------------------------|------------|-----|-----|
|                      |                       |                         | x          | y   | z   |
| Cerebellum           | P<0.001               | 5.63                    | 12         | -58 | -32 |
| Visual Cortex        | P<0.001               | 4.77                    | 20         | -90 | -10 |
| Cerebellum           | P<0.001               | 4.64                    | -4         | -82 | -26 |
| Retrosplenial Cortex | P=0.012               | 3.88                    | 2          | -44 | 20  |
| Retrosplenial Cortex | P=0.012               | 3.74                    | -2         | -50 | 12  |
| Parahippocampus      | P=0.047               | 4.43                    | -18        | -30 | -18 |
| Left Hippocampus     | P=0.047               | 4.12                    | -22        | -30 | -6  |
| Right Hippocampus    | P=0.015               | 4.23                    | 22         | -32 | -6  |
| Parahippocampus      | P=0.015               | 4.13                    | 24         | -24 | -26 |

**Table S3 | Representation of the inferred outcome; related to Figure 6.**

Brain regions showing significant representational similarity between the auditory cues  $X_n$  and associated outcomes  $Z_n$  during correct inference trials in the inference test (Figure 6F-G). In all regions, statistics are FWE whole-brain corrected at the cluster-level.

| Brain region             | P <sub>FWE-corr</sub> | T <sub>peak level</sub> | Coordinate |     |     |
|--------------------------|-----------------------|-------------------------|------------|-----|-----|
|                          |                       |                         | x          | y   | z   |
| Dopaminergic Midbrain    | P<0.001               | 5.56                    | -2         | -18 | -20 |
| medial Prefrontal Cortex | P=0.003               | 5.09                    | 8          | 46  | -4  |
| Retrosplenial Cortex     | P=0.002               | 4.87                    | -2         | -54 | 14  |
| Visual Cortex            | P=0.002               | 4.76                    | 10         | -60 | 6   |
| Association Cortex       | P=0.005               | 4.71                    | 62         | 2   | 2   |

**Table S4 | Number of mice; related to Figures 1-7.**  
Number of mice per group included in the experiment.

| Group                    | Number of mice included per group |                        |                 |                            |                                                  |           |             |
|--------------------------|-----------------------------------|------------------------|-----------------|----------------------------|--------------------------------------------------|-----------|-------------|
|                          | Total                             | Used in inference task | Implant in dCA1 | Implant in dCA1, mPFC, VTA | Combined electrophysiology-optogenetic silencing | ArchT-GFP | GFP-control |
| <b>Electrophysiology</b> | 10                                | 5                      | 6               | 4                          | 1                                                | 1         | 0           |
| <b>Optogenetic only</b>  | 14                                | 14                     | 14              | 0                          | 0                                                | 8         | 6           |
